# Supplementary material
Source: publisher figshare collection journal article supplement (https://acs.figshare.com/ndownloader/files/4379758)
Supplement: Supplementary file 1 [file 4379758]

data_sharp30
 
_audit_creation_method            SHELXL-97
_chemical_name_systematic
;
 ?
;
_chemical_name_common             ?
_chemical_melting_point           ?
_chemical_formula_moiety          ?
_chemical_formula_sum
 'C14 H18 I N5 O5 S'
_chemical_formula_weight          495.29
 
loop_
 _atom_type_symbol
 _atom_type_description
 _atom_type_scat_dispersion_real
 _atom_type_scat_dispersion_imag
 _atom_type_scat_source
 'C'  'C'   0.0033   0.0016
 'International Tables Vol C Tables 4.2.6.8 and 6.1.1.4'
 'H'  'H'   0.0000   0.0000
 'International Tables Vol C Tables 4.2.6.8 and 6.1.1.4'
 'N'  'N'   0.0061   0.0033
 'International Tables Vol C Tables 4.2.6.8 and 6.1.1.4'
 'O'  'O'   0.0106   0.0060
 'International Tables Vol C Tables 4.2.6.8 and 6.1.1.4'
 'S'  'S'   0.1246   0.1234
 'International Tables Vol C Tables 4.2.6.8 and 6.1.1.4'
 'I'  'I'  -0.4742   1.8119
 'International Tables Vol C Tables 4.2.6.8 and 6.1.1.4'
 
_symmetry_cell_setting            Monoclinic
_symmetry_space_group_name_H-M    P2(1)/c
 
loop_
 _symmetry_equiv_pos_as_xyz
 'x, y, z'
 '-x, y+1/2, -z+1/2'
 '-x, -y, -z'
 'x, -y-1/2, z-1/2'
 
_cell_length_a                    5.5727(12)
_cell_length_b                    13.436(3)
_cell_length_c                    23.627(5)
_cell_angle_alpha                 90.00
_cell_angle_beta                  92.485(7)
_cell_angle_gamma                 90.00
_cell_volume                      1767.4(7)
_cell_formula_units_Z             4
_cell_measurement_temperature     100(2)
_cell_measurement_reflns_used     3924
_cell_measurement_theta_min       2.28
_cell_measurement_theta_max       27.20
 
_exptl_crystal_description        block
_exptl_crystal_colour             colorless
_exptl_crystal_size_max           0.15
_exptl_crystal_size_mid           0.10
_exptl_crystal_size_min           0.05
_exptl_crystal_density_meas       ?
_exptl_crystal_density_diffrn     1.861
_exptl_crystal_density_method     'not measured'
_exptl_crystal_F_000              984
_exptl_absorpt_coefficient_mu     1.968
_exptl_absorpt_correction_type    multi-scan
_exptl_absorpt_correction_T_min   0.7567
_exptl_absorpt_correction_T_max   0.9080
_exptl_absorpt_process_details    sadabs
 
_exptl_special_details
;
 ?
;
 
_diffrn_ambient_temperature       100(2)
_diffrn_radiation_wavelength      0.71073
_diffrn_radiation_type            MoK\a
_diffrn_radiation_source          'fine-focus sealed tube'
_diffrn_radiation_monochromator   graphite
_diffrn_measurement_device_type   'CCD area detector'
_diffrn_measurement_method        'phi and omega scans'
_diffrn_detector_area_resol_mean  ?
_diffrn_standards_number          ?
_diffrn_standards_interval_count  ?
_diffrn_standards_interval_time   ?
_diffrn_standards_decay_%         ?
_diffrn_reflns_number             10117
_diffrn_reflns_av_R_equivalents   0.0536
_diffrn_reflns_av_sigmaI/netI     0.0853
_diffrn_reflns_limit_h_min        -7
_diffrn_reflns_limit_h_max        7
_diffrn_reflns_limit_k_min        -13
_diffrn_reflns_limit_k_max        16
_diffrn_reflns_limit_l_min        -29
_diffrn_reflns_limit_l_max        29
_diffrn_reflns_theta_min          1.73
_diffrn_reflns_theta_max          28.09
_reflns_number_total              3862
_reflns_number_gt                 2733
_reflns_threshold_expression      >2sigma(I)
 
_computing_data_collection        'Bruker SMART'
_computing_cell_refinement        'Bruker SMART'
_computing_data_reduction         'Bruker SAINT'
_computing_structure_solution     'SHELXS-97 (Sheldrick, 1990)'
_computing_structure_refinement   'SHELXL-97 (Sheldrick, 1997)'
_computing_molecular_graphics     'Bruker SHELXTL'
_computing_publication_material   'Bruker SHELXTL'
 
_refine_special_details
;
 Refinement of F^2^ against ALL reflections.  The weighted R-factor wR and
 goodness of fit S are based on F^2^, conventional R-factors R are based
 on F, with F set to zero for negative F^2^. The threshold expression of
 F^2^ > 2sigma(F^2^) is used only for calculating R-factors(gt) etc. and is
 not relevant to the choice of reflections for refinement.  R-factors based
 on F^2^ are statistically about twice as large as those based on F, and R-
 factors based on ALL data will be even larger.
;
 
_refine_ls_structure_factor_coef  Fsqd
_refine_ls_matrix_type            full
_refine_ls_weighting_scheme       calc
_refine_ls_weighting_details
 'calc w=1/[\s^2^(Fo^2^)+(0.0290P)^2^+0.0000P] where P=(Fo^2^+2Fc^2^)/3'
_atom_sites_solution_primary      direct
_atom_sites_solution_secondary    difmap
_atom_sites_solution_hydrogens    geom
_refine_ls_hydrogen_treatment     constr
_refine_ls_extinction_method      none
_refine_ls_extinction_coef        ?
_refine_ls_number_reflns          3862
_refine_ls_number_parameters      236
_refine_ls_number_restraints      0
_refine_ls_R_factor_all           0.0757
_refine_ls_R_factor_gt            0.0450
_refine_ls_wR_factor_ref          0.0870
_refine_ls_wR_factor_gt           0.0768
_refine_ls_goodness_of_fit_ref    1.003
_refine_ls_restrained_S_all       1.003
_refine_ls_shift/su_max           0.001
_refine_ls_shift/su_mean          0.000
 
loop_
 _atom_site_label
 _atom_site_type_symbol
 _atom_site_fract_x
 _atom_site_fract_y
 _atom_site_fract_z
 _atom_site_U_iso_or_equiv
 _atom_site_adp_type
 _atom_site_occupancy
 _atom_site_symmetry_multiplicity
 _atom_site_calc_flag
 _atom_site_refinement_flags
 _atom_site_disorder_assembly
 _atom_site_disorder_group
I1 I -0.60231(5) 0.27848(3) 0.465879(14) 0.02173(11) Uani 1 1 d . . .
S1 S 0.0889(2) 0.59864(9) 0.40038(5) 0.0159(3) Uani 1 1 d . . .
O1 O 0.3415(5) 0.6077(2) 0.39399(13) 0.0198(8) Uani 1 1 d . . .
O2 O -0.0153(5) 0.6251(2) 0.45279(13) 0.0213(8) Uani 1 1 d . . .
O3 O -0.0949(6) 0.1789(2) 0.30771(13) 0.0217(8) Uani 1 1 d . . .
O4 O 0.8839(5) 0.4323(2) 0.13532(13) 0.0192(8) Uani 1 1 d . . .
O5 O 0.5515(5) 0.4900(2) 0.08390(13) 0.0192(8) Uani 1 1 d . . .
N1 N 0.0131(7) 0.4798(3) 0.39062(16) 0.0153(9) Uani 1 1 d . . .
N2 N -0.0345(6) 0.3325(3) 0.34818(15) 0.0139(9) Uani 1 1 d . . .
N3 N 0.2080(7) 0.2756(3) 0.27498(16) 0.0160(9) Uani 1 1 d . . .
N4 N 0.2727(6) 0.4391(3) 0.31713(16) 0.0155(9) Uani 1 1 d . . .
N5 N 0.5155(7) 0.3788(3) 0.24854(15) 0.0158(9) Uani 1 1 d . . .
C1 C -0.3582(8) 0.2581(4) 0.4020(2) 0.0212(12) Uani 1 1 d . . .
H1B H -0.3508 0.1967 0.3823 0.025 Uiso 1 1 calc R . .
C2 C -0.2131(7) 0.3333(4) 0.38959(19) 0.0158(11) Uani 1 1 d . . .
C3 C -0.2031(8) 0.4351(4) 0.4167(2) 0.0183(11) Uani 1 1 d . . .
H3A H -0.3502 0.4740 0.4071 0.022 Uiso 1 1 calc R . .
H3B H -0.1806 0.4304 0.4584 0.022 Uiso 1 1 calc R . .
C4 C 0.0973(8) 0.4181(4) 0.34914(19) 0.0149(11) Uani 1 1 d . . .
C5 C 0.0233(9) 0.2555(4) 0.3090(2) 0.0189(12) Uani 1 1 d . . .
C6 C 0.3233(8) 0.3626(4) 0.28095(19) 0.0142(10) Uani 1 1 d . . .
C7 C 0.5848(8) 0.3073(4) 0.20551(19) 0.0186(11) Uani 1 1 d . . .
H7B H 0.5043 0.2428 0.2116 0.022 Uiso 1 1 calc R . .
H7C H 0.7606 0.2964 0.2084 0.022 Uiso 1 1 calc R . .
C8 C 0.5116(8) 0.3479(3) 0.14642(18) 0.0170(11) Uani 1 1 d . . .
H8A H 0.5617 0.3005 0.1171 0.020 Uiso 1 1 calc R . .
H8B H 0.3348 0.3550 0.1428 0.020 Uiso 1 1 calc R . .
C9 C 0.6282(8) 0.4473(4) 0.13753(18) 0.0155(11) Uani 1 1 d . . .
C10 C 0.5720(8) 0.5203(4) 0.18397(19) 0.0187(11) Uani 1 1 d . . .
H10A H 0.3993 0.5377 0.1809 0.022 Uiso 1 1 calc R . .
H10B H 0.6656 0.5821 0.1790 0.022 Uiso 1 1 calc R . .
C11 C 0.6322(8) 0.4770(3) 0.24291(19) 0.0177(11) Uani 1 1 d . . .
H11A H 0.8084 0.4696 0.2485 0.021 Uiso 1 1 calc R . .
H11B H 0.5756 0.5228 0.2723 0.021 Uiso 1 1 calc R . .
C12 C 0.7511(8) 0.4857(4) 0.04748(19) 0.0177(11) Uani 1 1 d . . .
H12A H 0.7494 0.5424 0.0207 0.021 Uiso 1 1 calc R . .
H12B H 0.7523 0.4226 0.0259 0.021 Uiso 1 1 calc R . .
C13 C 0.9608(8) 0.4919(4) 0.0896(2) 0.0263(13) Uani 1 1 d . . .
H13A H 1.1083 0.4645 0.0736 0.032 Uiso 1 1 calc R . .
H13B H 0.9910 0.5614 0.1018 0.032 Uiso 1 1 calc R . .
C14 C -0.0659(8) 0.6605(4) 0.34505(19) 0.0206(11) Uani 1 1 d . . .
H14A H -0.0398 0.7324 0.3489 0.031 Uiso 1 1 calc R . .
H14B H -0.2379 0.6461 0.3464 0.031 Uiso 1 1 calc R . .
H14C H -0.0068 0.6379 0.3088 0.031 Uiso 1 1 calc R . .
 
loop_
 _atom_site_aniso_label
 _atom_site_aniso_U_11
 _atom_site_aniso_U_22
 _atom_site_aniso_U_33
 _atom_site_aniso_U_23
 _atom_site_aniso_U_13
 _atom_site_aniso_U_12
I1 0.01763(17) 0.0257(2) 0.02240(18) 0.00264(16) 0.00660(11) -0.00090(16)
S1 0.0164(6) 0.0143(7) 0.0172(7) -0.0011(5) 0.0040(5) 0.0008(5)
O1 0.0160(18) 0.016(2) 0.027(2) -0.0021(15) 0.0039(14) 0.0001(14)
O2 0.0222(19) 0.028(2) 0.0148(18) -0.0045(15) 0.0092(13) -0.0006(15)
O3 0.025(2) 0.016(2) 0.024(2) -0.0036(16) 0.0042(14) -0.0048(16)
O4 0.0084(16) 0.032(2) 0.0170(18) 0.0066(16) 0.0037(12) -0.0012(15)
O5 0.0120(17) 0.027(2) 0.0187(19) 0.0070(15) 0.0048(13) 0.0013(15)
N1 0.018(2) 0.011(2) 0.017(2) -0.0018(17) 0.0067(15) -0.0021(17)
N2 0.016(2) 0.011(2) 0.015(2) -0.0005(17) 0.0023(15) -0.0005(17)
N3 0.017(2) 0.013(2) 0.018(2) -0.0009(18) 0.0045(15) -0.0032(18)
N4 0.016(2) 0.014(2) 0.017(2) -0.0005(18) 0.0057(16) 0.0012(17)
N5 0.021(2) 0.017(2) 0.010(2) -0.0034(17) 0.0068(15) 0.0018(18)
C1 0.016(3) 0.028(3) 0.020(3) -0.002(2) 0.0093(19) 0.003(2)
C2 0.010(2) 0.017(3) 0.021(3) 0.003(2) 0.0024(18) 0.005(2)
C3 0.017(3) 0.018(3) 0.020(3) 0.001(2) 0.0064(19) -0.003(2)
C4 0.019(3) 0.013(3) 0.012(3) 0.000(2) -0.0041(19) 0.001(2)
C5 0.019(3) 0.022(3) 0.016(3) 0.001(2) -0.004(2) 0.005(2)
C6 0.011(2) 0.017(3) 0.015(3) 0.004(2) 0.0031(17) 0.004(2)
C7 0.016(3) 0.018(3) 0.022(3) -0.004(2) 0.0035(19) 0.001(2)
C8 0.015(2) 0.017(3) 0.019(3) -0.002(2) 0.0020(18) 0.001(2)
C9 0.016(2) 0.020(3) 0.011(2) 0.004(2) 0.0021(18) 0.006(2)
C10 0.014(2) 0.019(3) 0.024(3) 0.004(2) 0.0030(19) -0.005(2)
C11 0.019(3) 0.017(3) 0.017(3) -0.002(2) 0.0063(19) -0.004(2)
C12 0.019(3) 0.017(3) 0.017(3) 0.000(2) 0.0055(19) 0.000(2)
C13 0.015(3) 0.041(4) 0.023(3) 0.000(3) 0.007(2) 0.001(2)
C14 0.019(3) 0.019(3) 0.023(3) 0.006(2) 0.0005(19) 0.001(2)
 
_geom_special_details
;
 All esds (except the esd in the dihedral angle between two l.s. planes)
 are estimated using the full covariance matrix.  The cell esds are taken
 into account individually in the estimation of esds in distances, angles
 and torsion angles; correlations between esds in cell parameters are only
 used when they are defined by crystal symmetry.  An approximate (isotropic)
 treatment of cell esds is used for estimating esds involving l.s. planes.
;
 
loop_
 _geom_bond_atom_site_label_1
 _geom_bond_atom_site_label_2
 _geom_bond_distance
 _geom_bond_site_symmetry_2
 _geom_bond_publ_flag
I1 C1 2.094(5) . ?
S1 O1 1.427(3) . ?
S1 O2 1.435(3) . ?
S1 N1 1.665(4) . ?
S1 C14 1.746(4) . ?
O3 C5 1.222(5) . ?
O4 C13 1.426(5) . ?
O4 C9 1.442(5) . ?
O5 C12 1.437(5) . ?
O5 C9 1.440(5) . ?
N1 C4 1.382(6) . ?
N1 C3 1.503(6) . ?
N2 C4 1.364(6) . ?
N2 C2 1.425(6) . ?
N2 C5 1.434(6) . ?
N3 C6 1.339(5) . ?
N3 C5 1.360(6) . ?
N4 C4 1.293(6) . ?
N4 C6 1.373(6) . ?
N5 C6 1.361(6) . ?
N5 C7 1.463(6) . ?
N5 C11 1.479(6) . ?
C1 C2 1.335(6) . ?
C1 H1B 0.9500 . ?
C2 C3 1.510(6) . ?
C3 H3A 0.9900 . ?
C3 H3B 0.9900 . ?
C7 C8 1.537(6) . ?
C7 H7B 0.9900 . ?
C7 H7C 0.9900 . ?
C8 C9 1.503(6) . ?
C8 H8A 0.9900 . ?
C8 H8B 0.9900 . ?
C9 C10 1.515(6) . ?
C10 C11 1.533(6) . ?
C10 H10A 0.9900 . ?
C10 H10B 0.9900 . ?
C11 H11A 0.9900 . ?
C11 H11B 0.9900 . ?
C12 C13 1.504(6) . ?
C12 H12A 0.9900 . ?
C12 H12B 0.9900 . ?
C13 H13A 0.9900 . ?
C13 H13B 0.9900 . ?
C14 H14A 0.9800 . ?
C14 H14B 0.9800 . ?
C14 H14C 0.9800 . ?
 
loop_
 _geom_angle_atom_site_label_1
 _geom_angle_atom_site_label_2
 _geom_angle_atom_site_label_3
 _geom_angle
 _geom_angle_site_symmetry_1
 _geom_angle_site_symmetry_3
 _geom_angle_publ_flag
O1 S1 O2 120.55(18) . . ?
O1 S1 N1 108.2(2) . . ?
O2 S1 N1 104.3(2) . . ?
O1 S1 C14 109.7(2) . . ?
O2 S1 C14 108.8(2) . . ?
N1 S1 C14 103.8(2) . . ?
C13 O4 C9 106.2(3) . . ?
C12 O5 C9 107.6(3) . . ?
C4 N1 C3 110.7(4) . . ?
C4 N1 S1 125.6(3) . . ?
C3 N1 S1 122.0(3) . . ?
C4 N2 C2 111.9(4) . . ?
C4 N2 C5 118.9(4) . . ?
C2 N2 C5 129.2(4) . . ?
C6 N3 C5 118.8(4) . . ?
C4 N4 C6 112.4(4) . . ?
C6 N5 C7 121.6(4) . . ?
C6 N5 C11 123.6(4) . . ?
C7 N5 C11 113.1(4) . . ?
C2 C1 I1 118.6(4) . . ?
C2 C1 H1B 120.7 . . ?
I1 C1 H1B 120.7 . . ?
C1 C2 N2 126.3(4) . . ?
C1 C2 C3 127.1(4) . . ?
N2 C2 C3 106.5(4) . . ?
N1 C3 C2 101.7(4) . . ?
N1 C3 H3A 111.4 . . ?
C2 C3 H3A 111.4 . . ?
N1 C3 H3B 111.4 . . ?
C2 C3 H3B 111.4 . . ?
H3A C3 H3B 109.3 . . ?
N4 C4 N2 126.5(4) . . ?
N4 C4 N1 124.9(4) . . ?
N2 C4 N1 108.6(4) . . ?
O3 C5 N3 124.9(5) . . ?
O3 C5 N2 119.2(5) . . ?
N3 C5 N2 115.8(4) . . ?
N3 C6 N5 117.8(4) . . ?
N3 C6 N4 127.5(4) . . ?
N5 C6 N4 114.7(4) . . ?
N5 C7 C8 109.3(4) . . ?
N5 C7 H7B 109.8 . . ?
C8 C7 H7B 109.8 . . ?
N5 C7 H7C 109.8 . . ?
C8 C7 H7C 109.8 . . ?
H7B C7 H7C 108.3 . . ?
C9 C8 C7 110.0(4) . . ?
C9 C8 H8A 109.7 . . ?
C7 C8 H8A 109.7 . . ?
C9 C8 H8B 109.7 . . ?
C7 C8 H8B 109.7 . . ?
H8A C8 H8B 108.2 . . ?
O5 C9 O4 106.3(3) . . ?
O5 C9 C8 111.3(3) . . ?
O4 C9 C8 108.3(4) . . ?
O5 C9 C10 108.4(4) . . ?
O4 C9 C10 110.6(3) . . ?
C8 C9 C10 111.7(4) . . ?
C9 C10 C11 111.6(4) . . ?
C9 C10 H10A 109.3 . . ?
C11 C10 H10A 109.3 . . ?
C9 C10 H10B 109.3 . . ?
C11 C10 H10B 109.3 . . ?
H10A C10 H10B 108.0 . . ?
N5 C11 C10 109.9(3) . . ?
N5 C11 H11A 109.7 . . ?
C10 C11 H11A 109.7 . . ?
N5 C11 H11B 109.7 . . ?
C10 C11 H11B 109.7 . . ?
H11A C11 H11B 108.2 . . ?
O5 C12 C13 101.6(4) . . ?
O5 C12 H12A 111.4 . . ?
C13 C12 H12A 111.4 . . ?
O5 C12 H12B 111.4 . . ?
C13 C12 H12B 111.4 . . ?
H12A C12 H12B 109.3 . . ?
O4 C13 C12 102.7(4) . . ?
O4 C13 H13A 111.2 . . ?
C12 C13 H13A 111.2 . . ?
O4 C13 H13B 111.2 . . ?
C12 C13 H13B 111.2 . . ?
H13A C13 H13B 109.1 . . ?
S1 C14 H14A 109.5 . . ?
S1 C14 H14B 109.5 . . ?
H14A C14 H14B 109.5 . . ?
S1 C14 H14C 109.5 . . ?
H14A C14 H14C 109.5 . . ?
H14B C14 H14C 109.5 . . ?
 
_diffrn_measured_fraction_theta_max    0.896
_diffrn_reflns_theta_full              25.00
_diffrn_measured_fraction_theta_full   0.971
_refine_diff_density_max    0.660
_refine_diff_density_min   -0.723
_refine_diff_density_rms    0.150
